# Supplementary material for: Role of Cytosolic Carboxypeptidase 5 in Neuronal Survival and Spermatogenesis
Source: PubMed Central journal article supplement (PMC5269731; doi:10.1038/srep41428), 2017-01-27
Supplement: srep41428-s1.pdf [file srep41428-s1.pdf]

## **Supplementary Information**

### **Role of Cytosolic Carboxypeptidase 5 in Neuronal Survival and Spermatogenesis**

Hui-Yuan Wu<sup>1</sup>, Peng Wei<sup>1</sup>, James I. Morgan<sup>1\*</sup>

<sup>1</sup>Department of Developmental Neurobiology, St. Jude Children's Research Hospital,  
Memphis, TN, USA

**\*Corresponding author:**

E-mail: [jim.morgan@stjude.org](mailto:jim.morgan@stjude.org) (JIM)

## Supplementary Figure S1

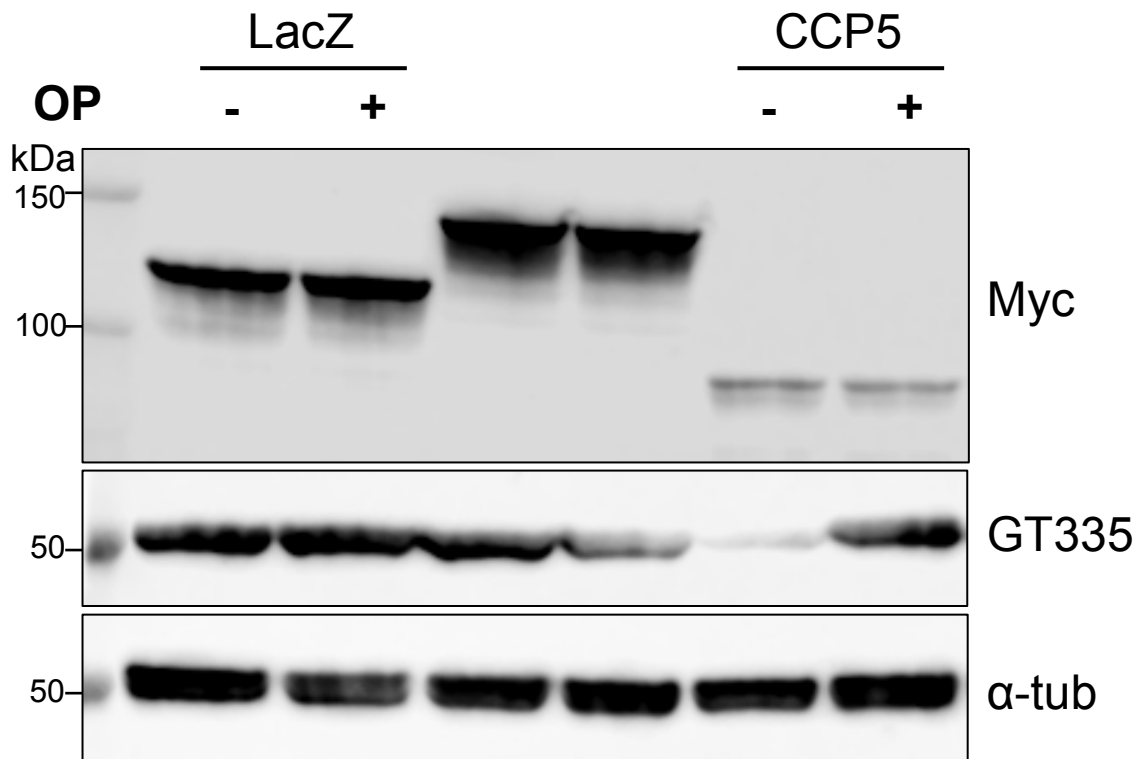

**Supplementary Figure S1.** The original blots of Fig. 1c, showing that CCP5 activity is specifically inhibited by 1,10-phenanthroline. Those lanes presented in Fig. 1c are indicated. Lanes 3 and 4 are not related to this study and were not presented in Fig. 1c.

## Supplementary Figure S2

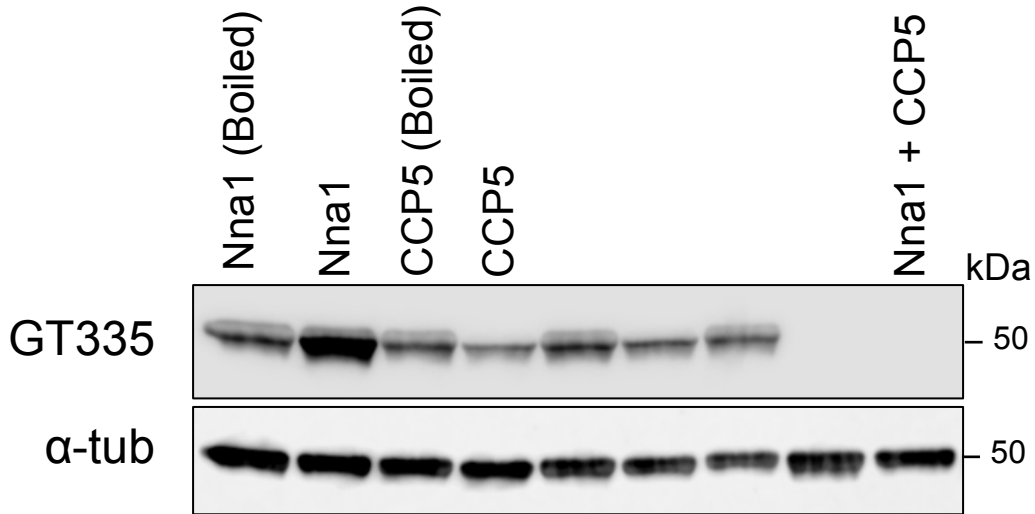

**Supplementary Figure S2.** The original blots for Fig. 2b, showing the activities of purified recombinant Nna1 and CCP5. The experiments for CCP5 and Nna1+CCP5 were duplicated. For brevity, only designated lanes are presented in Fig. 2b.

## Supplementary Figure S3

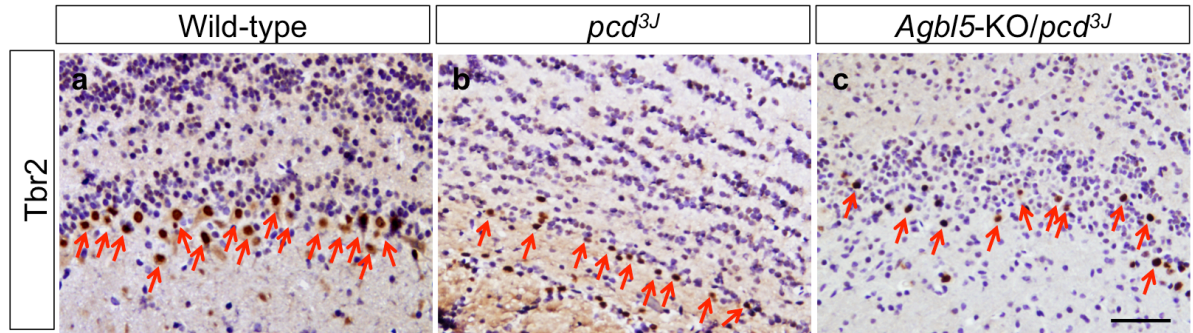

**Supplementary Figure S3.** Representative images of Tbr2 immunohistochemistry and hematoxylin counterstaining on olfactory bulb sections from 6 months old wild-type (a), *pcd*<sup>3J</sup> (b), and *Agbl5*-KO/*pcd*<sup>3J/-</sup> double mutant (c) mice. While Tbr2 positive olfactory bulb mitral cells (arrows) are preserved in wild-type animals (a), there is a similar level of mitral cell loss in *pcd* and *Agbl5*-KO/*pcd*<sup>3J</sup> double mutants (b, c). Note that the mitral cells in *pcd*<sup>3J</sup> and *Agbl5*-KO/*pcd*<sup>3J</sup> olfactory bulbs are shrunk with smaller nuclei than in wild-type mice. Scale bar: 50  $\mu$ m.

## Supplementary Figure S4

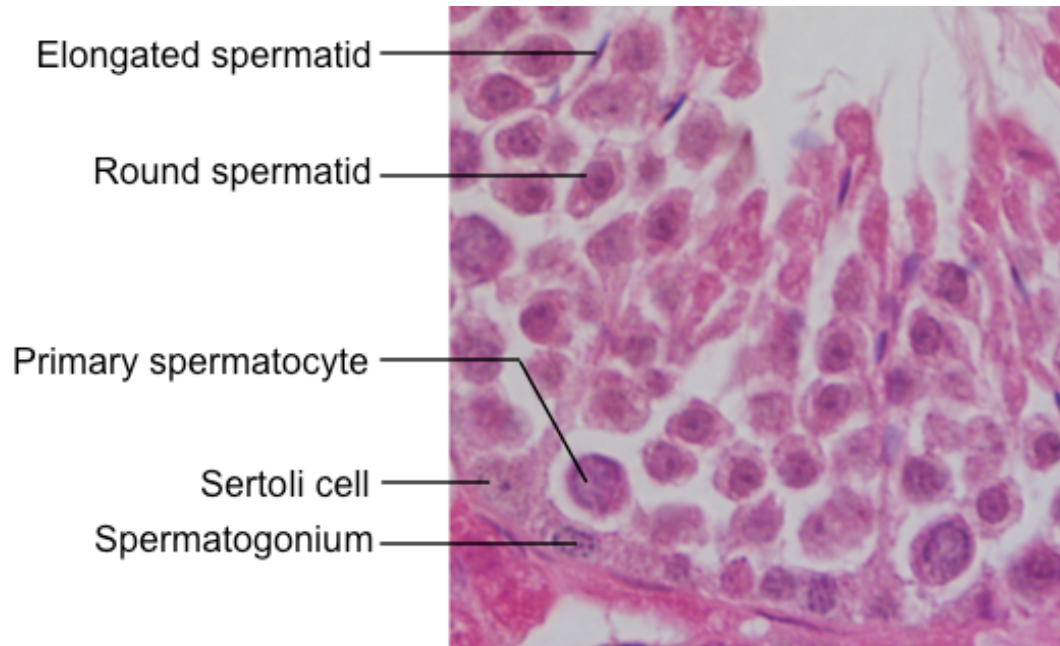

**Supplementary Figure S4.** Representative image of hematoxylin-eosin staining section of the adult mouse testis. Germ cells of different developmental stages and Sertoli cells are labeled to indicate their typical location in the testis.

## Supplementary Figure S5

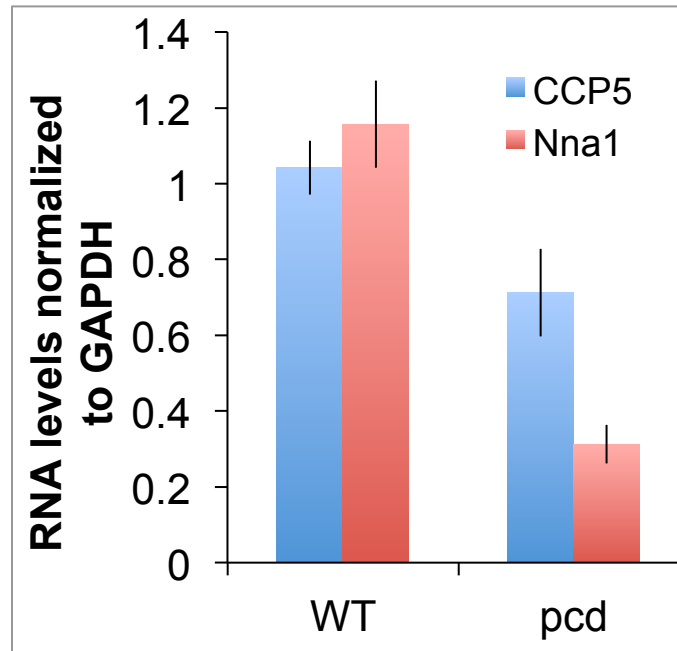

**Supplementary Figure S5.** Quantitative real-time PCR shows that both *Nna1* and *CCP5* RNA levels are reduced in testis of *pcd* mice compared to that of wild-type littermates at 3-month of age. RNA levels were normalized to internal GAPDH levels and compared with the values of wild-type testis. Bars are mean  $\pm$  SEM (error bars) of determinations from three animals.
